# Supplementary material for: Reconsideration of winds, wind waves, and turbulence in simulating wind-driven currents of shallow lakes in the Wave-current Coupled Model (WCCM) version 1.0
Source: Copernicus journal article supplement (doi:10.5194/gmd-2021-229), 2021-09-17
Supplement: Supplementary file [file gmd-2021-229-AC1-supplement.pdf]

# Author Response to CEC1

27 October 2021

Dear Editor,

Many thanks for your comments. We have revised our manuscript in light of these comments we have received. A pointwise  
5 reply is as follows.

**After checking your manuscript, it has come to our attention that it does not comply with our Code and Data Policy.**  
**[https://www.geoscientific-model-development.net/policies/code\\_and\\_data\\_policy.html](https://www.geoscientific-model-development.net/policies/code_and_data_policy.html)**

10 We have read the Code and Data Policy and agree the Code and Data Policy.

**Part of your code is archived in GitHub. However, GitHub is not a suitable repository. GitHub itself instructs authors to use other alternatives for long-term archival and publishing, such as Zenodo. Therefore, please, publish the code in one of the appropriate repositories.**

15

We have uploaded the source code of the EFDC model to the Zenodo. It can be freely archived from  
<https://doi.org/10.5281/zenodo.5602801> (Wu, 2021).

**In this way, please, be aware that you must include in a potential reviewed version of your manuscript the modified  
20 'Code and Data Availability' section, the DOI of the code.**

We have modified corresponding content of 'Code and Data Availability' section.

**Also, some of the Zenodo repositories that you have linked are restricted. We can not accept this. To limit access to  
25 the repositories has the same result that not sharing the information. Therefore, you must establish open repositories that you can not delete later.**

All restrictions have been cancelled.

The source code of the WCCM model is freely available from <https://doi.org/10.5281/zenodo.5181451> (Wu and Qin, 2021)

30 The dataset of measured water level and current is freely available from <https://doi.org/10.5281/zenodo.5184459> (Hu and Wu, 2021).

We thank you again for your consideration of this work and constructive comments.

Regards,

35 Tingfeng Wu and co-authors.
